# Supplementary material for: DNA methylation in genes of longevity-regulating pathways: association with obesity and metabolic complications
Source: PubMed Central journal article supplement (PMC6461164; doi:10.18632/aging.101882), 2019-03-29
Supplement: aging-11-101882-s002.pdf [file aging-11-101882-s002.pdf]

## SUPPLEMENTARY TABLES

**Supplementary Table 1. CpG sites associated with BMI residing in longevity genes (FDR<0.0001) in the whole population.**

|    | CpG_ID     | P.Value  | adj.P.Val | Gene          |
|----|------------|----------|-----------|---------------|
| 1  | cg21511036 | 8,96E-15 | 5,01E-11  | <i>IRS1</i>   |
| 2  | cg08862778 | 1,83E-13 | 3,37E-10  | <i>MTOR</i>   |
| 3  | cg11322849 | 1,57E-10 | 5,14E-08  | <i>INS</i>    |
| 4  | cg20406576 | 4,20E-10 | 1,07E-07  | <i>PRKAG2</i> |
| 5  | cg13551841 | 3,44E-09 | 5,12E-07  | <i>EHMT1</i>  |
| 6  | cg10136773 | 1,07E-08 | 1,17E-06  | <i>SESN3</i>  |
| 7  | cg07199894 | 1,38E-08 | 1,42E-06  | <i>ULK1</i>   |
| 8  | cg01749142 | 1,49E-08 | 1,51E-06  | <i>AKT1</i>   |
| 9  | cg11658986 | 1,58E-08 | 1,57E-06  | <i>ADCY6</i>  |
| 10 | cg21195984 | 1,91E-08 | 1,82E-06  | <i>EHMT1</i>  |
| 11 | cg15283498 | 2,18E-08 | 2,01E-06  | <i>FOXO3</i>  |
| 12 | cg14862787 | 4,15E-08 | 3,20E-06  | <i>CREB5</i>  |
| 13 | cg05792022 | 4,78E-08 | 3,55E-06  | <i>FOXO1</i>  |
| 14 | cg15973818 | 5,65E-08 | 4,00E-06  | <i>RB1CC1</i> |
| 15 | cg22048274 | 6,24E-08 | 4,28E-06  | <i>EHMT2</i>  |
| 16 | cg13810766 | 6,83E-08 | 4,57E-06  | <i>PRKAG2</i> |
| 17 | cg23709782 | 1,27E-07 | 7,22E-06  | <i>IGF1R</i>  |
| 18 | cg17848496 | 1,39E-07 | 7,72E-06  | <i>IRS1</i>   |
| 19 | cg04149773 | 1,39E-07 | 7,72E-06  | <i>ADCY6</i>  |
| 20 | cg02352203 | 1,42E-07 | 7,83E-06  | <i>RPTOR</i>  |
| 21 | cg14113970 | 2,16E-07 | 1,05E-05  | <i>CAMK4</i>  |
| 22 | cg14129040 | 2,30E-07 | 1,10E-05  | <i>CREB1</i>  |
| 23 | cg14844401 | 2,31E-07 | 1,11E-05  | <i>ADCY5</i>  |
| 24 | cg03813033 | 3,01E-07 | 1,33E-05  | <i>AKT1S1</i> |
| 25 | cg07012178 | 3,07E-07 | 1,35E-05  | <i>PRKAG2</i> |
| 26 | cg14267811 | 3,24E-07 | 1,41E-05  | <i>TSC1</i>   |
| 27 | cg01284192 | 4,12E-07 | 1,68E-05  | <i>IGF1R</i>  |
| 28 | cg24061580 | 4,71E-07 | 1,84E-05  | <i>PRKAG2</i> |
| 29 | cg01091261 | 5,50E-07 | 2,06E-05  | <i>ADCY9</i>  |

|    | CpG_ID     | P.Value  | adj.P.Val | Gene            |
|----|------------|----------|-----------|-----------------|
| 30 | cg06223834 | 6,22E-07 | 2,25E-05  | <i>ADCY9</i>    |
| 31 | cg18028483 | 6,40E-07 | 2,29E-05  | <i>SESN1</i>    |
| 32 | cg12416929 | 7,54E-07 | 2,58E-05  | <i>FOXO3</i>    |
| 33 | cg12566890 | 8,43E-07 | 2,80E-05  | <i>ADCY2</i>    |
| 34 | cg13574337 | 9,35E-07 | 3,01E-05  | <i>ADCY9</i>    |
| 35 | cg04832916 | 1,00E-06 | 3,18E-05  | <i>CAMKK2</i>   |
| 36 | cg13796676 | 1,12E-06 | 3,43E-05  | <i>SIRT1</i>    |
| 37 | cg06772578 | 1,30E-06 | 3,83E-05  | <i>PPARGCIA</i> |
| 38 | cg19503731 | 1,31E-06 | 3,85E-05  | <i>AKT3</i>     |
| 39 | cg10421188 | 1,36E-06 | 3,95E-05  | <i>CREB5</i>    |
| 40 | cg13613346 | 1,49E-06 | 4,22E-05  | <i>EHMT2</i>    |
| 41 | cg18758433 | 1,52E-06 | 4,28E-05  | <i>RPTOR</i>    |
| 42 | cg13154908 | 1,58E-06 | 4,39E-05  | <i>PIK3CA</i>   |
| 43 | cg24937356 | 1,96E-06 | 5,13E-05  | <i>PRKAA2</i>   |
| 44 | cg18237616 | 2,02E-06 | 5,25E-05  | <i>RHEB</i>     |
| 45 | cg14323456 | 2,06E-06 | 5,33E-05  | <i>RHEB</i>     |
| 46 | cg01781374 | 2,12E-06 | 5,44E-05  | <i>CAMK4</i>    |
| 47 | cg19292222 | 2,27E-06 | 5,70E-05  | <i>RPTOR</i>    |
| 48 | cg11301281 | 2,48E-06 | 6,08E-05  | <i>CREB5</i>    |
| 49 | cg02823066 | 2,54E-06 | 6,18E-05  | <i>IGF1</i>     |
| 50 | cg20300093 | 2,80E-06 | 6,63E-05  | <i>ADCY5</i>    |
| 51 | cg14077232 | 2,80E-06 | 6,63E-05  | <i>EHMT1</i>    |
| 52 | cg04932465 | 3,35E-06 | 7,52E-05  | <i>CAMKK2</i>   |
| 53 | cg08128650 | 3,40E-06 | 7,61E-05  | <i>RELA</i>     |
| 54 | cg08315825 | 3,61E-06 | 7,96E-05  | <i>IGF1R</i>    |
| 55 | cg19418273 | 3,89E-06 | 8,40E-05  | <i>CREB3L2</i>  |
| 56 | cg17324121 | 3,93E-06 | 8,44E-05  | <i>IRS2</i>     |
| 57 | cg00210002 | 4,12E-06 | 8,76E-05  | <i>EHMT2</i>    |
| 58 | cg14072989 | 4,51E-06 | 9,33E-05  | <i>RPS6KB1</i>  |

CpG\_ID: CpG loci identifier in Illumina platform

Adj. P. Val: Adjusted P value

**Supplementary Table S2. GEO datasets from metabolic studies using DNA methylation arrays with Infinium Human Methylation 450K (Illumina platform).**

| Geo Accession | Sample Tissue    | Sample Size | Gender | Age (y)                                                                | BMI (kg/m <sup>2</sup> )                                                               | Study Title                                                                                                                                               |
|---------------|------------------|-------------|--------|------------------------------------------------------------------------|----------------------------------------------------------------------------------------|-----------------------------------------------------------------------------------------------------------------------------------------------------------|
| GSE76285      | PBMC             | 80          | Women  | 36.4 ± 6.3<br>(Insulin Sensitive)<br>35.7 ± 5.7<br>(Insulin Resistant) | >35 kg/m <sup>2</sup><br>(with comorbidities)<br>or >40 kg/m <sup>2</sup>              | The epigenetic signature of systemic insulin resistance in obese women. PMID: 27535281                                                                    |
| GSE65057      | Liver tissue     | 15          | Men    | 40.5 ± 4.1<br>(Non Obese)<br>41.6 ± 4.1<br>(Obese)                     | 26.1 ± 2.0 kg/m <sup>2</sup><br>(Non Obese)<br>38.9 ± 2.1 kg/m <sup>2</sup><br>(Obese) | Altered DNA methylation of glycolytic and lipogenic genes in liver from obese and type 2 diabetic patients. PMID: 26977391                                |
| GSE67024      | Subcutaneous fat | 29          | Women  | 45 ± 11<br>(Non Obese)<br>46 ± 11<br>(Obese)                           | 25.2 ± 2.5 kg/m <sup>2</sup><br>(Non Obese)<br>41.3 ± 4.4 kg/m <sup>2</sup><br>(Obese) | The epigenetic signature of subcutaneous fat cells is linked to altered expression of genes implicated in lipid metabolism in obese women. PMID: 26351548 |
| GSE54776      | Visceral fat     | 14          | Men    | 33.6 ± 5.8<br>(Met Syndrome -)<br>42.4 ± 10.9<br>(Met Syndrome +)      | 50.7 ± 3.5<br>(Met Syn -)<br>55.8 ± 8.4<br>(Met Syn +)                                 | Gene methylation profiles in visceral adipose tissue of obese mens with or without metabolic syndrome. PMID: 24495915                                     |

BMI: Body Mass Index

PBMC: Peripheral Blood Mononuclear Cells
