# Supplementary material for: DNA methylation in genes of longevity-regulating pathways: association with obesity and metabolic complications
Source: publisher site journal article supplement (doi:10.18632/aging.101882), 2019-03-29
Supplement: Supplementary file [file aging-v11i6-101882-supplementary-material-SD1.pdf]

**SUPPLEMENTARY FIGURES**

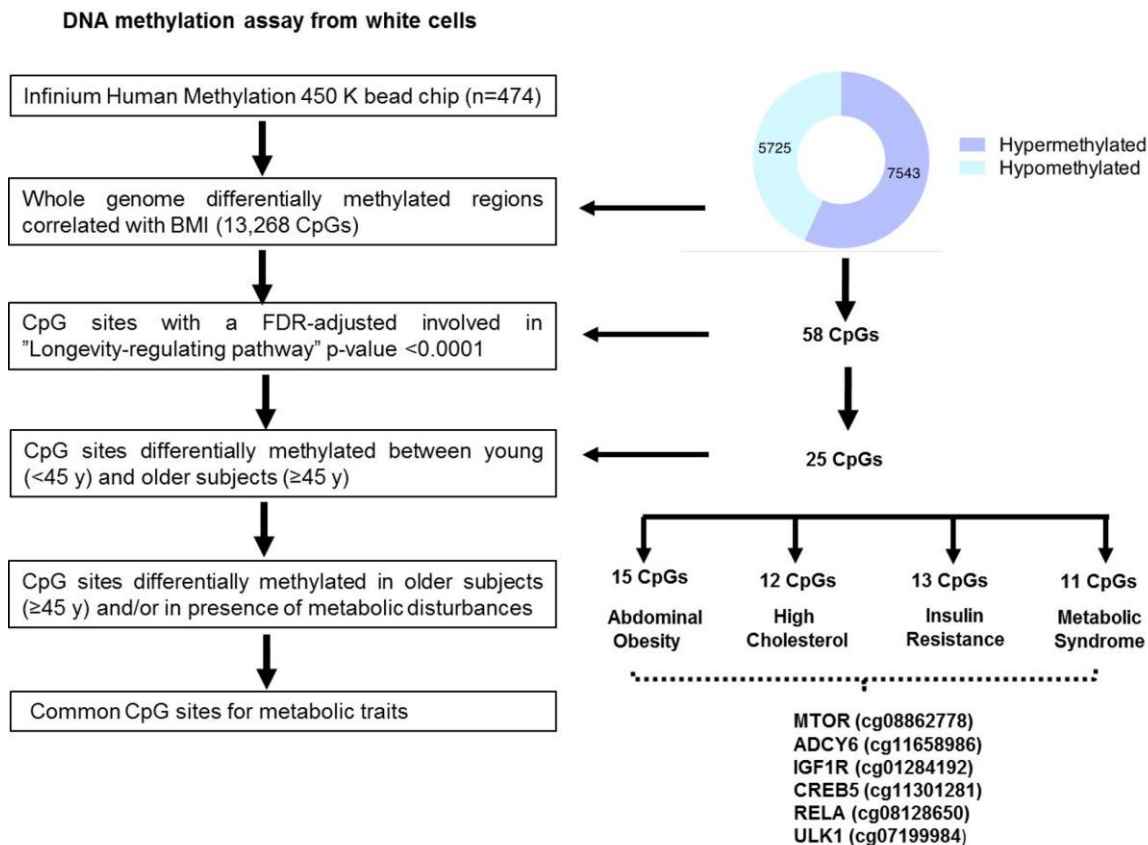

**Supplementary Figure S1.** Scheme of CpG selection process for the analyses.

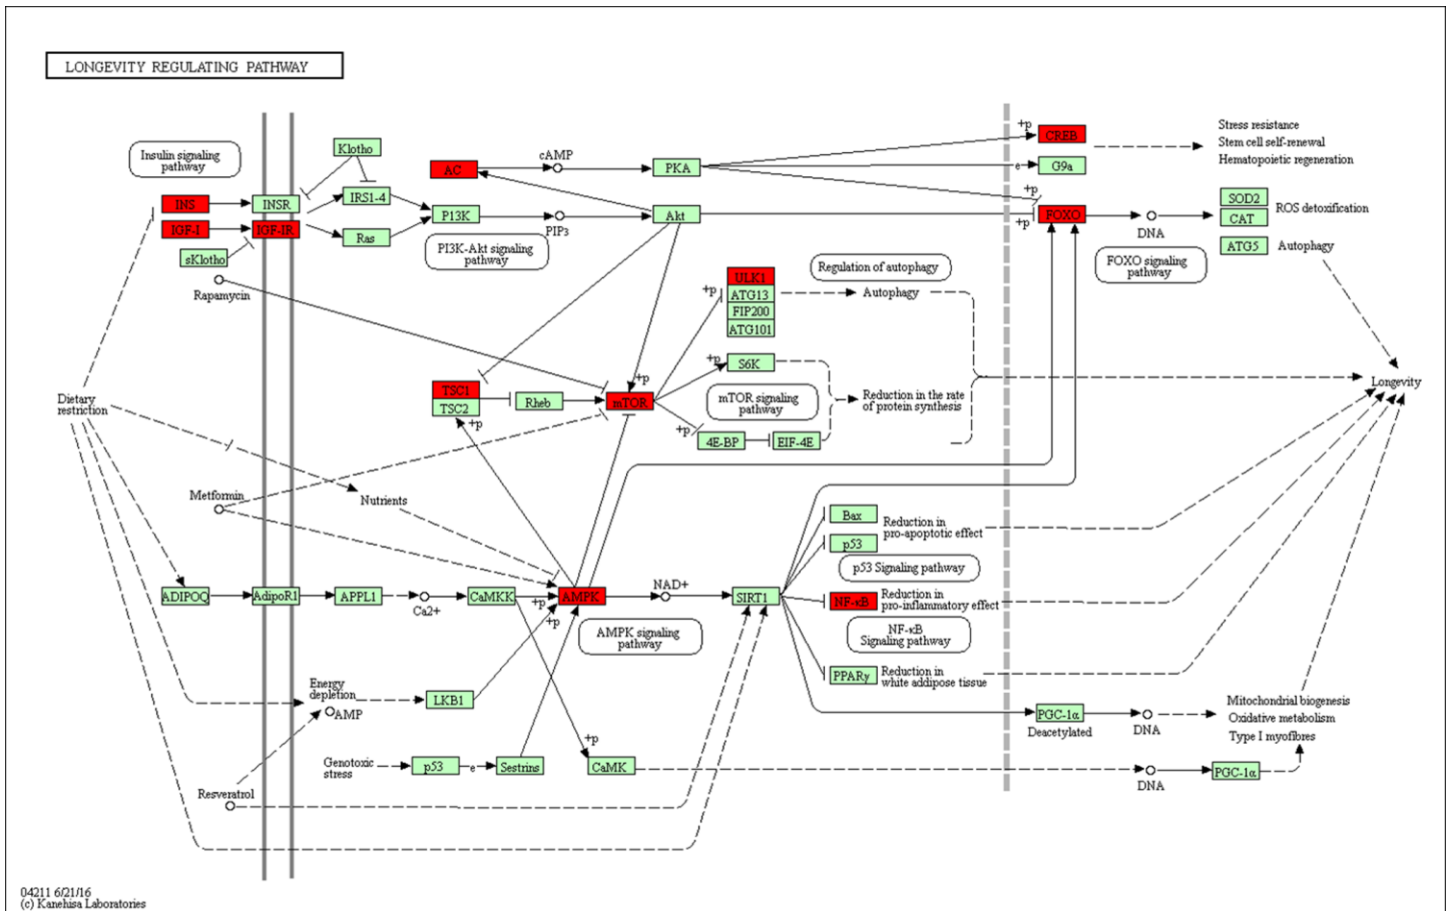

**Supplementary Figure S2.** Longevity Regulating Pathways genes. Red boxes correspond to those CpG sites differentially methylated associated to older subjects and the presence of metabolic disturbances. Diagram modified from KEGG Database.
